# Supplementary material for: Control of silver–polymer aggregation mechanism by primary particle spatial correlations in dynamic fractal-like geometry
Source: Royal Society of Chemistry journal article supplement (doi:10.1039/c1nr10474h), 2011-01-01
Supplement: c1nr10474h.pdf [file c1nr10474h.pdf]

### Supplementary information

We have verified the reliability of refined parameters by calculating their confidence intervals. The reduced standard deviations (*rsd*)  $\Delta R/R$ ,  $\Delta\sigma/\sigma$ ,  $\Delta N/N$ , of the refined parameters  $R$ ,  $\sigma$  and  $N$  are plotted as a function of the time in Fig. 1a, 1b, 1c, respectively. For  $t < t_0$ ,  $\Delta N/N$ ,  $\Delta R/R$ ,  $\Delta\sigma/\sigma$ , are quite large; as the reaction takes place, the *rsd* on the refined parameters  $R$ ,  $\sigma$ ,  $N$ , (describing the  $I_p(q)$  term) exceeds 20% before the instants  $t^*_{20}=50\text{s}$ ,  $t^*_{40}=20\text{s}$  and  $t^*_{60}=15\text{s}$  at 20 °C, 40 °C and 60 °C respectively. In this time ranges,  $\Delta P_E/P_E$  generally assume small reasonable values (Fig. 2), although we note large  $\Delta P_E/P_E$  values at the beginning of the reaction at  $T=20$  °C due to noisy scattering in the high  $q$  region. These observations indicate that the contribution  $I_p(q)$  to the model of eq.1 is almost negligible before the starting of the reactions; plus, considering  $rsd < 0.2$ , as a reasonable threshold for the reliability of refined parameters, the model of Fig.1 starts to work properly at the  $t^*$  instants.

The model of eq. 1 has been derived considering the interference effects due to monodisperse hard spheres; in Fig. 3 we can check the reliability of this approximation. We observe that the standard deviation of both  $R_{HS}$  and  $\eta$  assume sufficiently small values as the reaction takes place and goes on at  $T=40$  °C and  $T=20$  °C, while large fluctuations of  $\eta$  take place at 60 °C also at  $t > 50\text{s}$ .

## Figures

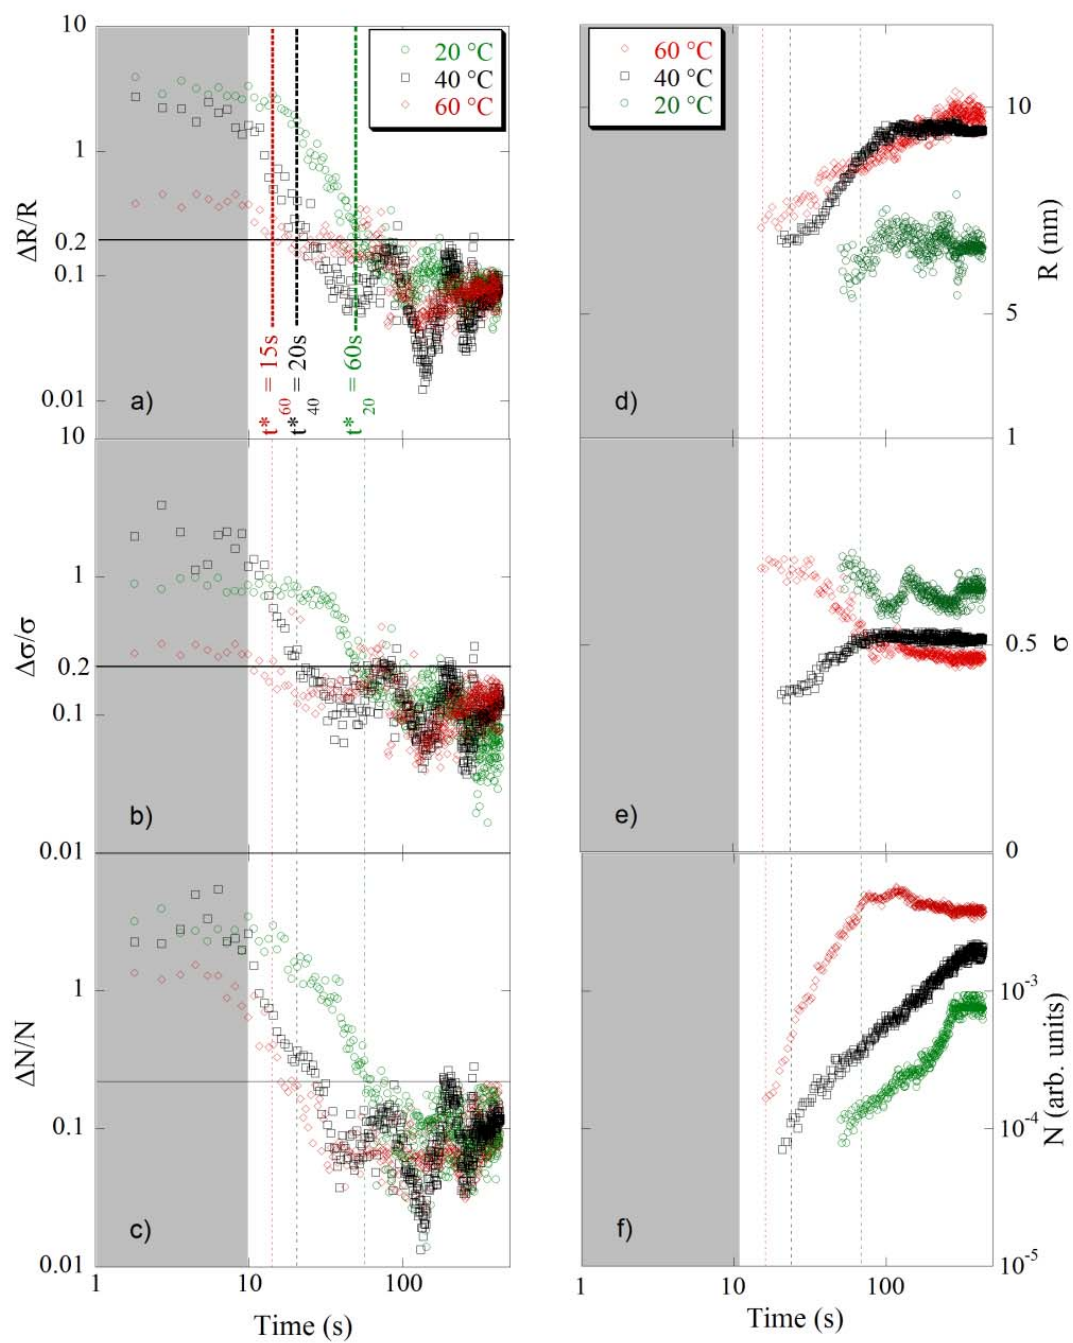

**Figure 1:** a)  $\Delta R/R$ , b)  $\Delta\sigma/\sigma$ , c)  $\Delta N/N$  d)  $R$ , e)  $\sigma$  and f)  $N$  plotted as a function of the time.

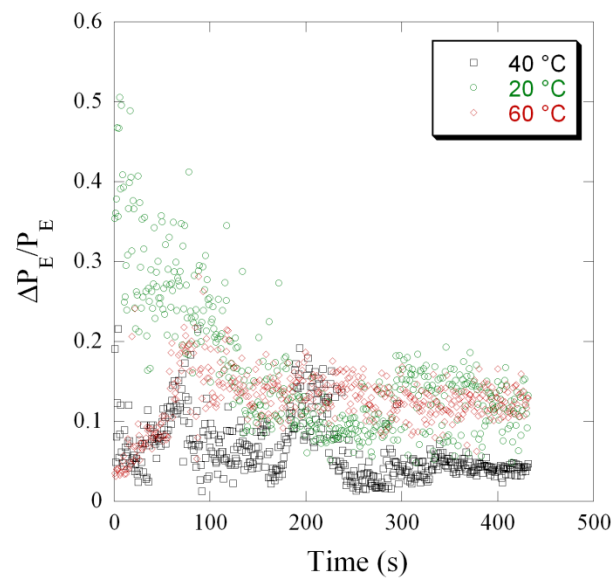

**Figure 2:**  $\Delta P_E/P_E$  as a function of the time.

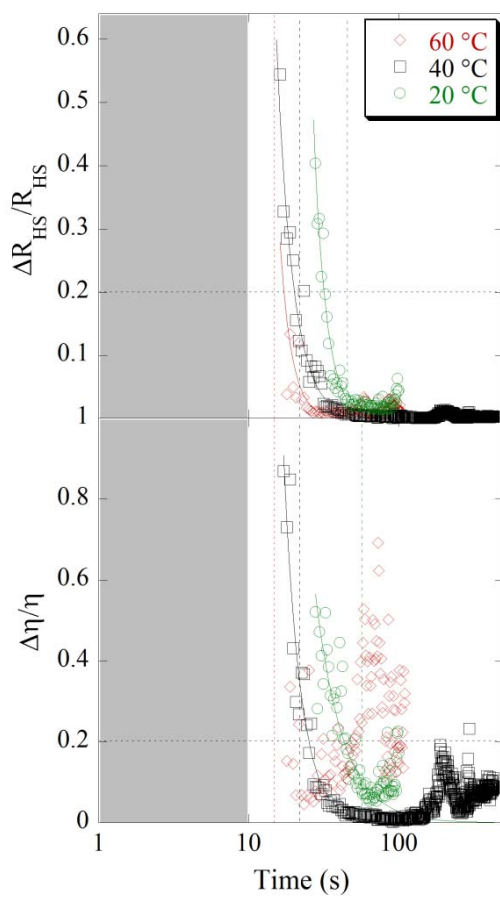

**Figure 3:** (upper panel)  $\Delta R_{HS}/R_{HS}$  and (lower panel)  $\Delta\eta/\eta$  as a function of the time.
